# Supplementary material for: TRPC3 and NALCN channels drive pacemaking in substantia nigra dopaminergic neurons
Source: eLife. 2021 Aug 19;10:e70920. doi: 10.7554/eLife.70920 (PMC8456572; doi:10.7554/eLife.70920)
Supplement: Figure 1—figure supplement 1—source data 1. [file elife-70920-fig1-figsupp1-data1.xlsx]

## Sheet: Figure 1-S1B
	mean	±SD	±SEM	median	95% CI	n
Control	3.79798	1.29236	0.43079	3.18182	2.8-4.79	9
Isradipine	3.69889	0.93949	0.31316	3.47619	2.97-4.42	9
Control	4.18095	1.92884	0.8626	4.7619	1.78-6.57	5
ZD-7288	4.09524	1.56093	0.69807	4	2.15-6.03	5
Control	3.72222	1.92884	0.42189	3.5	2.63-4.8	6
Isradipine&ZD-7288	3.19048	1.56093	0.51684	3.47619	1.86-4.51	6
p-value (ANOVA)	isradipin : 0.44395; ZD-7288 : 0.94033; isradipin&ZD-7288 : 0.44395
individual values
	isradipine			ZD-7288			Isradipine&ZD-7288
	control	Isradipine		control	ZD-7288		control	Isradipine&ZD-7288
	4.90476	4.71429		4.7619	4.47619		4.66667	4
	3	2.72727		6.61905	6.52381		2.19048	2.66667
	5.45455	4.63636		2.33333	2.66667		3.38095	3.42857
	3.14286	2.47619		2.09524	2.80952		3.47619	0.95238
	3.18182	3.45455		5.09524	4		3.52381	3.52381
	1.7619	2.7619					5.09524	4.57143
	4.54545	4.09091
	5.33333	4.95238
	2.85714	3.47619
	n = 9 from 5 mice			n = 5 from 5 mice			n = 6 from 4 mice
mean	3.79798	3.69889		4.18095	4.09524		3.72222	3.19048
S.D.	1.29236	0.93949		1.92884	1.56093		1.03342	1.26599
S.E.M	0.43079	0.31316		0.8626	0.69807		0.42189	0.51684

## Sheet: Figure 1-S1D
	mean	±SD	±SEM	median	95% CI	n
Control	3.78572	1.45117	0.59244	3.61905	2.26-5.3	6
SKF-96365	0.60317	0.62355	0.25456	0.35714	-0.05-1.25	6
Control	3.66667	3.07078	1.3733	2.95238	-0.14-7.47	5
2-APB	0.26667	0.51793	0.23163	0.04762	-0.37-0.9	5
p-value (ANOVA)	SKF-96365 : 5.91012E-4 ; 2-APB : 0.04048
individual values
	SKF-96365			2-APB
	control	SKF-96365		control	2-APB
	3.38095	0.04762		3.85714	0
	3.42857	1.47619		1.52381	0
	1.71429	0.09524		8.80952	1.19048
	3.80952	0.47619		2.95238	0.04762
	4.19048	1.28571		1.19048	0.09524
	6.19048	0.2381
	n = 6 from 4 mice			n = 5 from 5 mice
mean	3.78572	0.60317		3.66667	0.26667
S.D.	1.45117	0.62355		3.07078	0.51793
S.E.M	0.59244	0.25456		1.3733	0.23163

## Sheet: Figure 1-S1G
			mean	±SD	±SEM	median	95% CI	n
Phase I	ZD-7288	Contol	-68.6222	2.13577	0.95514	-67.551	-71.27~-65.97	5
		ZD-7288	-73.2366	2.92433	1.3078	-73.484	-76.86~-69.6	5
	Isadipine	Contol	-69.7566	2.80301	1.14433	-69.3952	-72.69~-66.81	6
		Isradipin	-66.0345	1.87174	0.76414	-66.064	-67.99~-64.07	6
Phase III		Contol	-45.9333	1.81008	0.73896	-46.26	-47.83~-44.03	6
		Isradipin	-48.5817	1.81345	0.74034	-48.67	-50.48~-46.67	6
p-value (ANOVA)	Phase I, ZD-7288 : 0.02150, isradipine : 0.02212; Phase III, isradipine : 0.02978
individual values
		Phase I				Phase III
		ZD-7288		Isradipine		Isradipine
		Control	ZD-7288	Control	Isradipine	Control	Isradipine
		-67.551	-70.04	-69.634	-66.682	-44.29	-45.73
		-68.95	-73.484	-74.485	-68.346	-48.17	-50.01
		-72.205	-76.428	-70.769	-65.446	-46.21	-49.38
		-66.954	-75.734	-68.4591	-63.4827	-46.31	-47.96
		-67.451	-70.497	-66.036	-64.563	-47.27	-50.7
				-69.1564	-67.6873	-43.35	-47.71
		n = 4 from 4 mice		n = 6 from 4 mice
mean		-68.6222	-73.2366	-69.7566	-66.0345	-45.9333	-48.5817
S.D.		2.13577	2.92433	2.80301	1.87174	1.81008	0.73896
S.E.M		0.95514	1.3078	1.14433	0.76414	1.81345	0.74034
