# Supplementary material for: TRPC3 and NALCN channels drive pacemaking in substantia nigra dopaminergic neurons
Source: eLife. 2021 Aug 19;10:e70920. doi: 10.7554/eLife.70920 (PMC8456572; doi:10.7554/eLife.70920)
Supplement: Figure 1—figure supplement 2—source data 1. [file elife-70920-fig1-figsupp2-data1.xlsx]

## Sheet: Figure 1-S2
	mean	±SD	±SEM	median	95% CI	n
Control	3.54286	0.61868	0.27668	3.57143	2.77-4.31	5
Isradipine	3.62857	0.83598	0.37386	3.47619	2.59-4.66	5
Isradipine&ZD-7288	3.77143	0.50215	0.22457	3.66667	3.14-4.39	5
p-value (ANOVA)	Control vs. Isradipine : 0.85837, Control vs. Isradipine&ZD-7288 : 0.53918
individual values
	Control	Isradipine	Isradipine&ZD-7288
	3.14286	3.71429	3.95238
	2.80952	2.66667	4.52381
	3.7619	3.33333	3.52381
	3.57143	3.47619	3.19048
	4.42857	4.95238	3.66667
	n = 5 from 4 mice
mean	3.54286	3.62857	3.77143
S.D.	0.61868	0.83598	0.50215
S.E.M	0.27668	0.37386	0.22457
