# Supplementary material for: TRPC3 and NALCN channels drive pacemaking in substantia nigra dopaminergic neurons
Source: eLife. 2021 Aug 19;10:e70920. doi: 10.7554/eLife.70920 (PMC8456572; doi:10.7554/eLife.70920)
Supplement: Figure 1—source data 1. [file elife-70920-fig1-data1.xlsx]

## Sheet: Figure 1C
	Three phases
	mean	±SD	±SEM	median	95% CI	n
Phase I	0.18607	0.04897	0.01095	0.17777	0.16-0.2	20
Phase II	0.8976	0.0559	0.0125	0.89531	0.8-0.9	20
Phase III	0.08367	0.03288	0.00735	0.08879	0.06-0.09	20
individual values
		Phase I	Phase II	Phase III
		0.12179	0.91987	0.04167
		0.23558	0.88942	0.125
		0.17373	0.87288	0.04661
		0.21986	0.83924	0.0591
		0.20621	0.83616	0.04237
		0.18874	0.92053	0.10927
		0.21689	0.84247	0.05936
		0.14203	0.92234	0.06437
		0.19372	0.89765	0.09137
		0.25352	0.78873	0.04225
		0.15926	0.99092	0.15018
		0.14213	0.9467	0.08883
		0.14234	0.9708	0.11314
		0.15089	0.93787	0.08876
		0.12456	0.96975	0.09431
		0.14483	0.9617	0.10653
		0.26837	0.84026	0.10863
		0.2918	0.83607	0.12787
		0.18182	0.8756	0.05742
		0.16338	0.89296	0.05634
		n = 20 from 12 mice
mean		0.18607	0.08367	0.8976
S.D.		0.04897	0.03288	0.0559
S.E.M		0.01095	0.00735	0.0125

## Sheet: Figure 1D
Frequency vs. Slope
Frequency (Hz)	Slope (mV/s)	±S.D.	±S.E.M
2.45455	56.7618	4.05135	1.22153
1.63636	32.3304	4.5973	1.38614
3	54.7757	6.81703	2.05541
3	73.8495	7.12421	2.14803
1.18182	28.7155	2.58903	0.78062
1.63636	35.2384	5.63912	1.70026
2.36364	36.5287	4.96623	1.49738
2.90909	39.7905	4.5028	1.35765
2.36364	42.1678	2.22407	0.67058
2.54545	41.9372	4.85716	1.46449
4.63636	70.4342	6.55421	1.97617
2.90909	44.4667	5.57469	1.68083
5	70.6272	7.06133	2.12907
5.72727	74.5726	11.1103	3.34988
4.27273	66.3431	6.94825	2.09498
6.09091	77.093	16.0668	4.84432
5	60.3115	18.9017	5.69908
5.36364	75.2897	12.1854	3.67405
4.72727	63.9126	10.6085	3.19859
3.45455	66.6111	4.23343	1.33873
3	48.8956	6.12325	1.84623
3.33333	52.5439	8.61551	2.59768
3.83333	56.7428	7.76011	2.33976
simple linear regression model : y = 21.288+9.7*x, r = 0.87
n = 23 from 15 mice

## Sheet: Figure 1F
	mean	±SD	±SEM	median	95% CI	n
Control	2.2381	0.77489	0.23364	2.33333	1.17-2.75	11
Pyr10	0.22078	0.27952	0.08428	0.09524	0.03-0.40	11
Control	2.71428	0.90382	0.30127	3	2.01-3.4	9
Pyr3	0.18519	0.22768	0.07589	0.04762	0.01-0.36	9
p-value (ANOVA)	Pyr10 : 9.21705E-8 ; Pyr3 : 4.42198E-7
individual values
	Pyr10			Pyr3
	control	Pyr10		control	Pyr3
	1.52381	0		2.38095	0.19048
	2.66667	0.09524		2.14286	0.47619
	1.47619	0.04762		3	0
	1.61905	0.52381		3.04762	0
	2.47619	0.2381		1.7619	0
	3.33333	0.66667		1.33333	0
	2.33333	0		3.04762	0.04762
	2.71429	0		4.28571	0.42857
	1.61905	0.14286		3.42857	0.52381
	1.33333	0
	3.52381	0.71429
	n = 11 from 9 mice			n = 9 from 5 mice
mean	2.2381	0.22078		2.71429	0.18519
S.D.	0.77489	0.27951		0.90382	0.22768
S.E.M	0.23364	0.08428		0.30127	0.07589

## Sheet: Figure 1G
Control		pyr10
Fluoresnce	Counts	Fluoresnce	Counts
0.966	1	0.965	1
0.968	0	0.967	4
0.97	2	0.969	4
0.972	1	0.971	8
0.974	1	0.973	3
0.976	4	0.975	13
0.978	9	0.977	14
0.98	4	0.979	25
0.982	5	0.981	22
0.984	10	0.983	37
0.986	14	0.985	41
0.988	9	0.987	51
0.99	16	0.989	30
0.992	10	0.991	26
0.994	17	0.993	35
0.996	19	0.995	41
0.998	25	0.997	23
1	13	0.999	25
1.002	18	1.001	19
1.004	22	1.003	16
1.006	26	1.005	15
1.008	21	1.007	4
1.01	26	1.009	9
1.012	16	1.011	1
1.014	19	1.013	1
1.016	15	1.015	2
1.018	19	1.017	1
1.02	13	1.019	0
1.022	10	1.021	1
1.024	10	1.023	0
1.026	9	1.025	1
1.028	9	1.027	0
1.03	9
1.032	10
1.034	5
1.036	5
1.038	3
1.04	5
1.042	4
1.044	5
1.046	5
1.048	5
1.05	5
1.052	2
1.054	2
1.056	4
1.058	2
1.06	1
1.062	2
1.064	2
1.066	1
1.068	1
1.07	0
1.072	0
1.074	0
1.076	1
1.078	0
1.08	0

## Sheet: Figure 1I
	mouse 1	mouse 2	mouse 3		mean	SD	S.E.M
both positive	0.82677	0.94595	0.98122		0.91798	0.08093	0.04673
TRPC3 positive	0.17323	0.05405	0.01878		0.08202	0.08093	0.04673

## Sheet: Figure 1J
100 bp	-----------
