# Supplementary material for: TRPC3 and NALCN channels drive pacemaking in substantia nigra dopaminergic neurons
Source: eLife. 2021 Aug 19;10:e70920. doi: 10.7554/eLife.70920 (PMC8456572; doi:10.7554/eLife.70920)
Supplement: Figure 2—figure supplement 1—source data 1. [file elife-70920-fig2-figsupp1-data1.xlsx]

## Sheet: Sheet1
									Fig 2-supplement 1. B							Fig 2-supplement 1. C			Fig 2-supplement 1. D
		Time (ms)							Percentage							Slope (V/ms)			AHP (mV)
		Control			Regenerated				Control			Regenerated				Control	Regenerated		Control	Regenerated
		Phase I	Phase II	Phase III	Phase I	Phase II	Phase III		Phase I	Phase II	Phase III	Phase I	Phase II	Phase III		42.8916	49.5341		-73.97	-72.25
		60	332	36	78.2	279	22		14.0187	77.5701	8.41121	20.6224	73.576	5.80169		39.8747	23.6332		-72.25	-76.85
		108	399	44	125	567	61		19.6007	72.4138	7.98548	16.6003	75.2988	8.10093		99.4245	52.0833		-66.8	-65.55
		27	139	13	41	192	22		15.0838	77.6536	7.26257	16.0784	75.2941	8.62745		95.443	86.1244		-69.73	-68.48
		68	237	22	36	209	22		20.7951	72.4771	6.72783	13.4832	78.2772	8.2397		76.2712	47.8873		-73.09	-68.06
		91	236	34	50	355	34		25.2078	65.374	9.41828	11.3895	80.8656	7.74487		82.9694	44.0771		-77.27	-72.67
		69	229	31	101	363	73		20.9726	69.6049	9.42249	18.8082	67.5978	13.594		23.6486	44.7799		-74	-70.15
		110	592	37	122	318	31		14.885	80.1082	5.00677	25.9023	67.5159	6.58174
																n = 7 from 4 mice			n = 7 from 4 mice
																p = 0.14			p = 0.34
		n = 7 from 4 mice							n = 7 from 4 mice
									p values : Phase I = 0.62, Phase II = 0.81, Phase III = 0.60
mean									18.65	73.6	7.74	17.45	74.22	8.31		65.78	44.18		-72.44	-70.57
S.D.									4.12	5.17	1.57	4.77	4.79	2.33		29.96	21.28		3.35	3.71
S.E.M									1.56	1.95	0.59	1.8	1.81	0.88		11.32	8.04		1.26	1.4
