# Supplementary material for: TRPC3 and NALCN channels drive pacemaking in substantia nigra dopaminergic neurons
Source: eLife. 2021 Aug 19;10:e70920. doi: 10.7554/eLife.70920 (PMC8456572; doi:10.7554/eLife.70920)
Supplement: Figure 2—source data 1. [file elife-70920-fig2-data1.xlsx]

## Sheet: Figure 2B
	mean	±SD	±SEM	median	95% CI	n
Control	1.97431	0.51949	0.21208	1.95022	1.42-2.51	6
Pyr10	0	0	0	0	0	6
+20 pA	0.41515	0.35264	0.14396	0.47273	0.045-0.78	6
+40 pA	1.78788	0.47296	0.19309	1.72727	1.29-2.28	6
p-value (ANOVA)	Control vs. 0 pA : 3.05094E-6; Control vs. 20 pA : 1.18368E-4; Control vs. 40 pA : 0.53032
individual values
		control	Pyr10	+20 pA	+40 pA
		1.18182	0	0	2.45455
		1.72727	0	0.81818	1.27273
		2.4	0	0	1.54545
		2.63636	0	0.72727	2.18182
		1.80952	0	0.54545	1.90909
		2.09091	0	0.4	1.36364
		n = 6 from 3 mice
mean		1.97431	0	0.41515	1.78788
SD		0.51949	0	0.35264	0.47296
S.E.M		0.21208	0	0.14396	0.19309

## Sheet: Figure 2E
	mean	±SD	±SEM	median	95% CI	n			mean	±SD	±SEM	median	95% CI	n
TTX	-47.1729	0.98932	0.37393	-47.14	-48.08~-46.25	7		TTX	-47.1729	0.98932	0.37393	-47.14	-48.08~-46.25	7
TTX&isradipine	-50.446	1.74446	0.78014	-49.56	-52.61~-48.28	5		TTX&isradipine	-50.446	1.74446	0.78014	-49.56	-52.61~-48.28	5
TTX&pyr10	-63.1817	3.37624	1.37835	-62.745	-66.72~-59.63	6		TTX&pyr10	-63.1817	3.37624	1.37835	-62.745	-66.72~-59.63	6
NMDG	-71.092	0.72562	0.32451	-70.91	-71.99~-70.19	5		NMDG	-71.092	0.72562	0.32451	-70.91	-71.99~-70.19	5
p-value (ANOVA)	TTX vs. TTX&isradipine : 0.00192; TTX vs. TTX&pyr10 : 1.12536E-7; TTX vs. NMDG : 5.96745E-13							p-value (ANOVA)	TTX vs. TTX&isradipine : 0.00192; TTX vs. TTX&pyr10 : 1.12536E-7; TTX vs. NMDG : 5.96745E-13
individual values								individual values
		TTX	TTX&isradipine	TTX&pyr10	NMDG					TTX	TTX&isradipine	TTX&pyr10	NMDG
		-48.17	-49.56	-67.47	-71.13					-48.17	-49.56	-67.47	-71.13
		-45.98	-52.09	-57.92	-70.48					-45.98	-52.09	-57.92	-70.48
		-46.02	-49.3	-62.07	-70.91					-46.02	-49.3	-62.07	-70.91
		-48.62	-48.73	-66.14	-70.63					-48.62	-48.73	-66.14	-70.63
		-47.02	-52.55	-63.27	-72.31					-47.02	-52.55	-63.27	-72.31
		-47.14		-62.22						-47.14		-62.22
		-47.26								-47.26
		n = 7 from 6 mice	n = 5 from 3 mice	n = 6 from 3 mice	n = 5 from 3 mice					n = 7 from 6 mice	n = 5 from 3 mice	n = 6 from 3 mice	n = 5 from 3 mice
mean		-47.1729	-50.446	-63.1817	-71.092			mean		-47.1729	-50.446	-63.1817	-71.092
SD		0.98932	1.74446	3.37624	0.72562			SD		0.98932	1.74446	3.37624	0.72562
S.E.M		0.37393	0.78014	1.37835	0.32451			S.E.M		0.37393	0.78014	1.37835	0.32451
