# Supplementary material for: TRPC3 and NALCN channels drive pacemaking in substantia nigra dopaminergic neurons
Source: eLife. 2021 Aug 19;10:e70920. doi: 10.7554/eLife.70920 (PMC8456572; doi:10.7554/eLife.70920)
Supplement: Figure 3—figure supplement 1—source data 1. [file elife-70920-fig3-figsupp1-data1.xlsx]

## Sheet: Figure 3-S1
		mean	±SD	±SEM	median	95% CI	n
Frequency	Th-eGPF (ICR)	3.28291	0.54696	0.13266	3.33333	3-3.56	17
	Wild-type (129 sv/ev)	3.0024	0.61224	0.12766	3.2	2.73-3.26	23
	TRPC3 KO (129 sv/ev)	2.75874	0.74691	0.15574	2.47619	2.43-3.08	23
Vpeak	Th-eGPF (ICR)	17.0756	4.94575	1.23644	16.96	14.44-19.71	16
	Wild-type (129 sv/ev)	14.908	4.5732	1.44617	13.745	11.63-18.17	10
	TRPC3 KO (129 sv/ev)	12.0755	4.391	1.38856	11.865	8.93-15.21	10
VAHP	Th-eGPF (ICR)	-70.9106	3.02462	0.75616	-71.815	-72.52~-69.29	16
	Wild-type (129 sv/ev)	-70.623	2.90573	0.91887	-71.175	-72.7~-68.54	10
	TRPC3 KO (129 sv/ev)	-69.654	3.63351	1.14902	-69.175	-72.25~-67.05	10
Spike threshold	Th-eGPF (ICR)	-40.4838	1.10662	0.27666	-40.41	-41.07~-39.89	16
	Wild-type (129 sv/ev)	-40.853	2.37034	0.74957	-41.235	-42.54~-37.15	10
	TRPC3 KO (129 sv/ev)	-41.004	4.17265	1.31951	-41.72	-43.98~-38.01	10
Input resistance	Th-eGPF (ICR)	244.436	59.2388	17.1008	244.902	193.54-341.77	12
	Wild-type (129 sv/ev)	235.591	56.2318	16.2327	229.342	192.30-321.42	12
	TRPC3 KO (129 sv/ev)	219.912	92.0396	25.5272	230.769	142.85-400	13
Capacitance	Th-eGPF (ICR)	50.8862	6.84139	2.4188	50.93	45.16-56.6	8
	Wild-type (129 sv/ev)	43.774	12.4048	2.09679	41.86	39.51-48.03	35
	TRPC3 KO (129 sv/ev)	47.1175	11.3743	2.14955	47.27	42.7-51.52	28
p-value (ANOVA)	All data, p > 0.05
individual values
		Figure 3-supplement 1. C			Figure 3-supplement 1. D			Figure 3-supplement 1. E			Figure 3-supplement 1. F			Figure 3-supplement 1. G			Figure 3-supplement 1. H
		Frequency			Vpeak			VAHP			Spike threshold			Input resistance			Capacitance
		Th-eGPF	WT	KO	Th-eGPF	WT	KO	Th-eGPF	WT	KO	Th-eGPF	WT	KO	Th-eGPF	WT	KO	Th-eGPF	WT	KO
		3.33333	3.36364	3.375	22.2	13.09	10.47	-72.45	-72.01	-64.49	-40.38	-35.89	-41.18	232.558	321.429	263.158	56	30.81	46.67
		3.28571	3.21429	3	20.04	12.11	7.856	-75.09	-65.79	-72.67	-40.41	-41.07	-44.11	266.667	306.122	142.857	43.7	41.86	63.4
		3.38095	2.8	2.14286	12.77	12.11	7.529	-70.15	-75.61	-66.45	-40.41	-41.4	-33.23	175.439	272.727	163.934	59.93	34.82	51.49
		3.14286	3.25	2.2	15.29	14.4	12.11	-71.82	-69.07	-67.43	-39.16	-40.33	-42.26	245.902	288.462	111.111	48.1	63.77	47.27
		3.42857	2.22727	2.375	16.96	21.93	14.08	-71.41	-73.65	-66.12	-42.51	-42.32	-37.24	341.772	220.588	178.571	58.03	40.17	68.55
		3.57143	2.52381	2.63636	12.35	14.73	17.68	-71.81	-68.74	-73.32	-40.79	-44.16	-46.92	333.333	153.846	312.5	44.05	23.14	47.27
		2.52381	2	4.53846	16.96	9.37	14.31	-73.08	-67.56	-72.1	-39.58	-43.19	-39.66	267.327	208.333	106.383	43.52	39.03	67.29
		3.7619	3.2	1.85	19.52	21.51	19.31	-73.88	-71.45	-75.61	-42.25	-38.68	-43.85	243.902	149.254	256.41	53.76	40.47	29.4
		3.66667	2.42857	2.66667	11.1	10.15	5.79	-68.06	-71.03	-69.14	-40.05	-39.74	-37.2	193.548	263.158	277.778		49.18	55.39
		2.71429	3.2381	2.38095	28.69	19.68	11.62	-72.24	-71.32	-69.21	-40.21	-41.75	-44.39	202.703	238.095	400		49.85	61.27
		4.57143	3.14286	4	19.84			-65.17			-40.63			283.019	212.766	230.769		52.46	46
		3.52381	3.90476	2.14286	14.65			-67.85			-40.44			147.059	192.308	303.03		49.4	40.17
		2.71429	3.2381	2.47619	20.55			-68.29			-38.17					112.36		21.13	49.4
		3	2.09524	3.33333	20.32			-73.12			-42.06							37.43	58.34
		2.38095	1.95238	2.09524	11.65			-65.83			-40.73							47.48	47
		3.85714	3.52381	2.33333	10.32			-74.32			-39.96							40.77	48.96
		2.95238	3.28571	2.14286														42.02	55.39
			3.95238	3														38.35	30.55
			2.7619	2.19048														30.38	52.23
			4.09524	3.14286														28.71	33.75
			3.04762	4.33333														69	42.51
			2.47619	2.09524														74.61	53.24
			3.33333	3														20.81	42.18
																		58.97	42.68
																		57.42	32.64
																		42.51	23.44
																		35.61	34.71
																		40.62	48.1
																		51.73
																		39.45
																		54.84
																		44.4
																		51.49
																		49.4
																		40
mean		3.28291	3.0024	2.75874	17.0756	14.908	12.0755	-70.9106	-70.623	-69.654	-40.4838	-40.853	-41.004	244.436	235.591	219.912	50.8862	43.774	47.1175
S.D.		0.54696	0.61224	0.74691	4.94575	4.5732	4.391	3.02462	2.90573	3.63351	1.10662	2.37034	4.17265	59.2388	56.2318	92.0396	6.84139	12.4048	11.3743
S.E.M		0.13266	0.12766	0.15574	1.23644	1.44617	1.38856	0.75616	0.91887	1.14902	0.27666	0.74957	1.31951	17.1008	16.2327	25.5272	2.4188	2.09679	2.14955
