# Supplementary material for: TRPC3 and NALCN channels drive pacemaking in substantia nigra dopaminergic neurons
Source: eLife. 2021 Aug 19;10:e70920. doi: 10.7554/eLife.70920 (PMC8456572; doi:10.7554/eLife.70920)
Supplement: Figure 3—figure supplement 2—source data 1. [file elife-70920-fig3-figsupp2-data1.xlsx]

## Sheet: Figure3-S2
		mean	±SD	±SEM	median	95% CI	n/M
WT	Control	2.24286	0.63232	0.19996	2.11905	1.79-2.69	10/5
	Pyr10	0.07619	0.17417	0.05508	0	-0.04-0.2	10/5
	Control	1.88095	0.33285	0.11768	1.78571	1.60-2.15	8/6
	SKF-96365	0.14881	0.22828	0.08071	0.04762	-0.04-0.33	8/6
KO	Control	2.08929	0.75397	0.26657	1.90476	1.45-2.71	8/4
	Pyr10	2.3869	0.67891	0.24003	2.19048	1.81-2.95	8/4
	Control	2.42857	0.83462	0.34073	2.40476	1.55-3.3	6/6
	SKF-96365	2.63492	0.77	0.31435	2.69048	1.82-3.44	6/6
p-value (ANOVA)	WT, Pyr10 : 4.53985E-9, SKF-96365 : 8.07063E-9; KO, Pyr10 : 0.42064, SKF-96365 : 0.66572
individual values
	WT					KO
	Pyr10		SKF-96365			Pyr10		SKF-96365
	control	Pyr10	control	SKF-96365		control	Pyr10	control	SKF-96365
	1.80952	0	2	0		1.28571	2	1.95238	1.7619
	2.09524	0	2.14286	0		2	3.09524	3.80952	3.90476
	1.61905	0	1.52381	0.61905		2	3.2381	1.33333	1.90476
	1.61905	0	1.85714	0.04762		1.57143	2.14286	2.19048	2.66667
	2.14286	0	1.57143	0.04762		3.61905	3.14286	2.66667	2.85714
	2.52381	0.2381	2.52381	0		2.7619	2.2381	2.61905	2.71429
	1.95238	0	1.71429	0.38095		1.66667	1.71429
	2.19048	0.52381	1.71429	0.09524		1.80952	1.52381
	2.7619	0
	3.71429	0
	n = 10 from 5 mice		n = 8 from 4 mice			n = 8 from 6 mice		n = 6 from 5 mice
mean	2.24286	0.07619	1.88095	0.14881		2.08929	2.3869	2.42857	2.63492
S.D.	0.63232	0.17417	0.33285	0.22828		0.75397	0.67891	0.83462	0.77
S.E.M	0.19996	0.05508	0.11768	0.08071		0.26657	0.24003	0.34073	0.31435
