# Supplementary material for: TRPC3 and NALCN channels drive pacemaking in substantia nigra dopaminergic neurons
Source: eLife. 2021 Aug 19;10:e70920. doi: 10.7554/eLife.70920 (PMC8456572; doi:10.7554/eLife.70920)
Supplement: Figure 3—figure supplement 3—source data 1. [file elife-70920-fig3-figsupp3-data1.xlsx]

## Sheet: Figure 3-S3
		mean	±SD	±SEM	median	95% CI	n/M
WT	Control	2.9418	0.84568	0.28189	2.61905	2.29-3.59	9/6
	2-APB	0.58201	0.72366	0.24122	0.09524	0.02-1.13	9/6
	Control	3.2381	0.85555	0.34928	3.21429	2.34-4.13	6/5
	Isradipine	3.50794	1.46018	0.59612	3.16667	1.97-5.04	6/5
	Control	3.19048	1.79063	0.80079	2.95238	0.96-5.41	5/4
	ZD-7288	4.01905	2.20173	0.98464	3.95238	1.28-6.75	5/4
KO	Control	3.16667	0.37586	0.15344	3.21429	2.77-3.56	6/4
	2-APB	2.13492	0.704	0.28741	1.92857	1.39-2.87	6/4
	Control	2.65079	0.53083	0.21671	2.64286	2.09-3.2	6/4
	Isradipine	2.78571	0.51793	0.21145	2.85714	2.24-3.32	6/4
	Control	3.05844	0.82005	0.33478	2.7381	2.19-3.91	6/4
	ZD-7288	3.82107	1.23214	0.50302	3.90476	2.52-5.11	6/4
p-value (ANOVA)	WT, 2-APB : 9.45651E-6; KO, 2-APB : 0.01004; all other data, p > 0.05
individual values
	WT							KO
	2-APB		Isradipin		ZD-7288			2-APB		Isradipine		ZD-7288
	Control	2-APB	Control	Isradipine	Control	ZD-7288		Control	2-APB	Control	Isradipin	Control	ZD-7288
	3.72727	0	2.52381	2.04762	1.57143	1.80952		3.33333	1.95238	2.71429	3.33333	2.80952	3.52381
	3.90476	0.04762	4.28571	3.61905	3.42857	3.95238		2.95238	3.42857	3.42857	3.2381	3.2381	3.38095
	1.71429	0.47619	2.09524	2.19048	2.95238	4.61905		2.57143	2.28571	2.95238	3.14286	4.63636	5.54545
	2.42857	1.42857	3.14286	5.52381	1.90476	2.33333		3.09524	1.33333	2.38095	2.28571	2.52381	4.33333
	2.38095	0.09524	3.28571	4.95238	6.09524	7.38095		3.42857	1.90476	1.85714	2.14286	2.47619	1.85714
	2.95238	1.47619	4.09524	2.71429				3.61905	1.90476	2.57143	2.57143	2.66667	4.28571
	2.61905	1.66667
	2.47619	0.04762
	4.27273	0
	n = 9 from 6 mice		n = 6 from 5 mice		n = 5 from 4 mice			n = 6 from 4 mice		n = 5 from 4 mice		n = 6 from 4 mice
