# Supplementary material for: TRPC3 and NALCN channels drive pacemaking in substantia nigra dopaminergic neurons
Source: eLife. 2021 Aug 19;10:e70920. doi: 10.7554/eLife.70920 (PMC8456572; doi:10.7554/eLife.70920)
Supplement: Figure 3—figure supplement 4—source data 1. [file elife-70920-fig3-figsupp4-data1.xlsx]

## Sheet: Sheet1
	Figure 3-supplement 4. C									Figure 3-supplement 4. D
	mean	±SD	±SEM	median	95% CI	n				mean	±SD	±SEM	median	95% CI	n
Control	-47.1181	4.39729	1.66202	-49.4008	-51.05~--41.05	7			NMDG	10.5324	9.50446	3.59235	8.56531	2.67-29.25	7
NMDG	-71.8052	4.04606	1.52927	-71.4807	-74.06~-65.53	7			NMDG, +apamin	10.9463	9.26784	3.50291	8.27701	4.3-29.28	7
NMDG, +apamin	-72.4953	2.62856	0.9935	-73.4381	-74.95~-68.58	7			p-value (ANOVA)	p-value : 0.93
p-value (ANOVA)	Control vs. +NMDG = 1.35E-7; Control vs. +NMDG, +apamin =1.8E-8; +NMDG vs. +NMDG, +apamin = 0.711
									individual values
individual values
									Fluorescence intensity			Ca2+ decrease (%)
									TTX	NMDG	NMDG, +apamin	NMDG	NMDG, +apamin
	TTX	NMDG	NMDG, +apamin						85.0456	82.7711	79.7239	2.67449	6.25751
	-41.7757	-73.1585	-74.2981						86.9511	82.3646	83.2109	5.27478	4.30149
	-51.5456	-71.3855	-68.5874						22.007	19.0754	18.7179	13.3211	14.946
	-49.7433	-74.0671	-75.1146						55.7445	54.9571	54.892	1.41261	1.52929
	-49.4008	-65.531	-69.6853						67.2061	47.5444	47.526	29.2558	29.2832
	-45.2432	-68.7193	-73.4381						75.7046	65.6945	66.5977	13.2226	12.0296
	-51.0597	-71.4807	-71.3867						23.2355	21.2453	21.3123	8.56531	8.27701
	-41.0585	-78.2941	-74.9569						n = 7 from3 mice
	n = 7 from 3 mice
								mean	59.4135	53.3789	53.1401	10.5324	10.9463
mean	-47.1181	-71.8052	-72.4953					SD	27.2733	26.1456	25.899	9.50446	9.26784
SD	4.39729	4.04606	2.62856					S.E.M	10.3083	9.88213	9.78889	3.59235	3.50291
S.E.M	1.66202	1.52927	0.9935
