# Supplementary material for: TRPC3 and NALCN channels drive pacemaking in substantia nigra dopaminergic neurons
Source: eLife. 2021 Aug 19;10:e70920. doi: 10.7554/eLife.70920 (PMC8456572; doi:10.7554/eLife.70920)
Supplement: Figure 3—source data 1. [file elife-70920-fig3-data1.xlsx]

## Sheet: Figure 3C
		mean	±SD	±SEM	median	95% CI	n/M
WT	Control	2.67532	1.26374	0.3505	2.28571	1.91-3.43	13/11
	Pyr10	0.38761	0.70298	0.19497	0.04762	-0.03-0.81	13/11
	Control	3.99206	2.49778	1.01972	3	1.37-6.61	6/6
	SKF-96365	0.37302	0.7155	0.2921	0.04762	-0.37-1.12	6/6
KO	Control	3.45503	1.04521	0.3484	3.38095	2.65-4.25	9/6
	Pyr10	3.22222	1.22127	0.40709	3.14286	2.28-4.16	9/6
	Control	2.70068	1.1421	0.43167	2.95238	1.64-3.75	7/4
	SKF-96365	3.0068	1.59587	0.60318	2.71429	1.53-4.48	7/4
p-value (ANOVA)	WT, pyr10 : 4.51267E-4, SKF-96365 : 0.00664; KO, pyr10 : 0.66974, SKF-96365 : 0.68710
individual values
	WT					KO
	Pyr10		SKF-96365			Pyr10		SKF-96365
	control	Pyr10	control	SKF-96365		control	Pyr10	control	SKF-96365
	1.7619	0.04762	2.47619	0		3.38095	3.42857	4.61905	6.2381
	2.47619	0	1.61905	0.33333		2.38095	2.09524	1.42857	1
	3.47619	0.38095	2.14286	0.09524		4.04762	3.14286	2.95238	2.71429
	5.09524	2.04762	7.52381	0		5.14286	5.61905	3.33333	2.95238
	2.57143	0	3.52381	1.80952		2.71429	2.19048	1.57143	3.2381
	2.2381	0	6.66667	0		4.09524	4.14286	1.90476	2.28571
	2.28571	1.80952				1.85714	1.66667	3.09524	2.61905
	1.85714	0.47619				4.33333	3.85714
	4.72727	0.18182				3.14286	2.85714
	4	0.09524
	1.38095	0
	1.72727	0
	1.18182	0
	n = 13 from 11 mice		n = 6 from 6 mice			n = 10 from 6 mice		n = 7 from 4 mice
mean	2.67532	0.38761	3.99206	0.37302		3.45503	3.22222	2.70068	3.0068
S.D.	1.26374	0.70298	2.49778	0.7155		1.04521	1.22127	1.1421	1.59587
S.E.M	0.3505	0.19497	1.01972	0.2921		0.3484	0.40709	0.43167	0.60318

## Sheet: Figure 3E, F
membrane potential (Fig. 3e)										potential change (Fig. 3f)
		mean	±SD	±SEM	median	95% CI	n/M				mean	±SD	±SEM	median	95% CI	n/M
WT	TTX&ZD-7288	-51.0711	2.49301	1.11491	-50.4	-54.16~-47.97	5/5			WT	15.46	3.08275	1.37865	16.75	11.63-19.28	5/5
	Pyr10	-60.3909	2.85047	1.27477	-61.2543	-63.93~56.85	5/5			KO	23.91	4.13486	1.68805	23.539	19.57-28.25	6/5
	NMDG	-75.8522	2.92409	1.30769	-75.23	-79.48~-72.22	5/5			p-value (ANOVA)	WT vs. KO : 0.00444
KO	TTX&ZD-7288	-52.5717	2.47384	1.00994	-52.355	-49.97~-54.39	6/5
	Pyr10	-51.7583	2.35481	0.96135	-51.98	-49.28~-53.88	6/5
	NMDG	-75.67	2.58479	1.05524	-75.275	-72.95~-76.95	6/5
p-value (ANOVA)	WT, TTX&ZD-7288 vs. pyr10 : 5.71616E-4, pyr10 vs. NMDG : 2.89803E-5; KO, TTX&ZD-7288 vs. pyr10 : 0.57258, pyr10 vs. NMDG : 1.20541E-8
individual values
		Fig. 3e									Fig. 3f
		WT				KO					WT	KO
		TTX&ZD-7288 (Control)	Pyr10	NMDG		TTX&ZD-7288 (Control)	Pyr10	NMDG			14.87	22.87
		-50.4	-64.02	-78.89		-55.89	-54.08	-76.95			18.42	25.3971
		-49	-56.81	-75.23		-50.76	-50.3	-75.7			16.75	19.0545
		-49.02	-58.3	-75.05		-53.95	-53.66	-72.71			16.84	30.9737
		-51.98	-61.57	-78.41		-50.08	-49.04	-80.01			10.4266	24.208
		-54.95	-61.25	-71.68		-50.36	-49.59	-73.8				20.9721
						-54.39	-53.88	-74.85
		n = 5 from 5 mice				n = 6 from 5 mice
mean		-51.07	-60.39	-75.85		-52.57	-51.76	-75.67			15.46	23.91
S.D.		2.49	2.85	2.92		2.47	2.35	2.59			3.08	4.13
S.E.M		1.11	1.27	1.31		1.01	0.96131	1.06			1.37	1.68
