# Supplementary material for: TRPC3 and NALCN channels drive pacemaking in substantia nigra dopaminergic neurons
Source: eLife. 2021 Aug 19;10:e70920. doi: 10.7554/eLife.70920 (PMC8456572; doi:10.7554/eLife.70920)
Supplement: Figure 4—figure supplement 1—source data 1. [file elife-70920-fig4-figsupp1-data1.xlsx]

## Sheet: Figure4-S1
	mean	±SD	±SEM	median	95% CI	n
Control	2.86701	1.59541	0.42639	2.40476	1.94-3.78	14
L703,606	0.0068	0.02545	0.0068	0	-0.007-0.02	14
p-value (ANOVA)	Control vs. L703,606 : 4.07618E-7
individual values
		control	L703,606
		2.80952	0
		2.2381	0
		2.7619	0
		5.04762	0
		5.19048	0
		5.80952	0
		2.57143	0
		1.95238	0
		4.47619	0
		1.42857	0
		1.09524	0
		1.2381	0
		1.61905	0.09524
		1.9	0
		n = 14 from 6 mice
mean		2.86701	0.0068
S.D.		1.59541	0.02545
S.E.M		0.42639	0.0068
