# Supplementary material for: TRPC3 and NALCN channels drive pacemaking in substantia nigra dopaminergic neurons
Source: eLife. 2021 Aug 19;10:e70920. doi: 10.7554/eLife.70920 (PMC8456572; doi:10.7554/eLife.70920)
Supplement: Figure 4—figure supplement 2—source data 1. [file elife-70920-fig4-figsupp2-data1.xlsx]

## Sheet: Sheet1
									Figure 4-supplement 2. B							Figure 4-supplement 2. C			Figure 4-supplement 2. D
		Time (ms)							Percentage							Slope (V/ms)			AHP (mV)
		Control			Regenerated				Control			Regenerated				Control	Regenerated		Control	Regenerated
		Phase I	Phase II	Phase III	Phase I	Phase II	Phase III		Phase I	Phase II	Phase III	Phase I	Phase II	Phase III		29.0559	28.9417		-77.27	-70.99
		119	519	78	129	463	47		16.6201	72.486	10.8939	20.1878	72.457	7.35524		44.4444	30.7692		-77.27	-76.02
		89	405	25	91	585	62		17.1484	78.0347	4.81696	12.3306	79.2683	8.40108		49.4845	57.971		-58.01	-59
		34	194	18	32	138	19		13.8211	78.8618	7.31707	16.9312	73.0159	10.0529		50.1672	46.0829		-73.92	-72
		97	299	40	88	434	47		22.2477	68.578	9.17431	15.4657	76.2742	8.26011		30.3922	28.9157		-72.44	-71.1
		132	408	28	120	415	14		23.2394	71.831	4.92958	21.8579	75.592	2.55009
																n = 5 from 3 mice			n = 5 from 3 mice
																p = 0.77			p = 0.67
		n = 5 from 3 mice							n = 5 from 3 mice
									p values : Phase I = 0.62, Phase II = 0.57, Phase III = 0.95
mean									18.61	73.95	7.42	17.35	75.32	7.32		40.7	38.53		-71.78	-69.82
S.D.									3.99	4.36	2.65	3.78	2.74	2.84		10.27	13.03		7.98	6.38
S.E.M									1.78	1.95	1.18	1.69	1.22	1.27		4.59	5.82		3.57	2.85
