# Supplementary material for: TRPC3 and NALCN channels drive pacemaking in substantia nigra dopaminergic neurons
Source: eLife. 2021 Aug 19;10:e70920. doi: 10.7554/eLife.70920 (PMC8456572; doi:10.7554/eLife.70920)
Supplement: Figure 4—source data 1. [file elife-70920-fig4-data1.xlsx]

## Sheet: Figure 4D
	mean	±SD	±SEM	median	95% CI	n
control	1.73333	0.77374	0.31588	1.55	0.92-2.54	6
L-703,606	0	0	0	0	0	6
+10 pA	0.81667	1.10529	0.45123	0.35	-0.34-1.97	6
+20 pA	1	0.8	0.3266	0.65	0.16-1.83	6
+30 pA	1.46667	0.41793	0.17062	1.55	1.02-1.9	6
p-value (ANOVA)	control vs. L703,606 : 2.66466E-4; control vs. +10 pA : 0.12704 ; control vs. +20 pA : 0.13760; control vs. +40 pA : 0.47470
individual values
		control	0	+10 pA	+20 pA	+30 pA
		2.2	0	0.1	0.7	1.6
		0.9	0	3	2.5	2
		3	0	0.3	0.5	1.5
		1.3	0	0.9	1.3	1.7
		1.2	0	0.2	0.6	0.8
		1.8	0	0.4	0.4	1.2
		n = 6 from 4 mice
mean		1.73333	0	0.81667	1	1.46667
SD		0.77374	0	1.10529	0.8	0.41793
S.E.M		0.31588	0	0.45123	0.3266	0.17062

## Sheet: Figure 4F, G
membrane potential (Fig. 4F)										potential change (Fig. 4G)
		mean	±SD	±SEM	median	95% CI	n/M				mean	±SD	±SEM	median	95% CI	n/M
WT	TTX&ZD-7288	-50.29	4.27431	1.74498	-51.16	-54.78~-45.8	6/4			WT	8.41	2.15	0.87	7.87	6.15-10-67	6/4
	L703,606	-58.71	4.08489	1.66765	-60.39	-63~-54.42	6/4			KO	15.58	4.2443	1.73273	15.8522	11.13-20.03	6/4
	NMDG	-74.23	1.87817	0.76676	-73.485	-76.2~-72.26	6/4			p-value (ANOVA)	WT vs. KO : 0.00423
KO	TTX&ZD-7288	-49.61	3.38427	1.38162	-49.5261	-53.16~-46.06	6/4
	L703,606	-65.2	4.73982	1.93502	-64.6971	-70.17~-60.22	6/4
	NMDG	-75.82	2.75235	1.12364	-76.2789	-78.71~-72.94	6/4
p-value (ANOVA)	WT, TTX&ZD-7288 vs. L703,606 : 0.00585, L703,606 vs. NMDG : 7.22846E-6; KO, TTX &ZD-7288 vs. L703,606 : 6.43118E-5, L703,606 vs. NMDG : 7.79691E-4
individual values
		Fig. 4F									Fig. 4G
		WT				KO					WT	KO
		TTX&ZD-7288	L703,606	NMDG		TTX&ZD-7288	L703,606	NMDG			11.0279	16.0275
		-44.36	-55.39	-77.2		-53.9132	-69.9407	-77.7185			5.57	18.4295
		-46.6	-52.17	-75.76		-52.6393	-71.0688	-78.6681			10.9022	21.6327
		-49.04	-59.94	-73.41		-45.1114	-66.7442	-75.2533			7.2716	10.246
		-53.62	-60.89	-72.07		-50.6104	-60.8564	-70.781			8.17584	11.499
		-54.87	-63.05	-73.56		-48.4419	-59.9409	-76.3979			7.5651	15.677
		-53.28	-60.84	-73.4		-46.97	-62.65	-76.16
		n = 6 from 4 mice				n = 6 from 4 mice
mean		-50.29	58.71	-74.23		-49.61	-65.2	-75.82			8.41	15.58
SD		4.27	4.08	1.87		3.38	4.74	2.75			2.15	4.24
S.E.M		1.744	1.66	0.766		1.38	1.94	1.12			0.87	1.73
