# Supplementary material for: TRPC3 and NALCN channels drive pacemaking in substantia nigra dopaminergic neurons
Source: eLife. 2021 Aug 19;10:e70920. doi: 10.7554/eLife.70920 (PMC8456572; doi:10.7554/eLife.70920)
Supplement: Figure 5—source data 1. [file elife-70920-fig5-data1.xlsx]

## Sheet: Figure 5B
	mean	±SD	±SEM	median	95% CI	n/M
WT	98.3486	40.2726	15.2216	93	61.1-135.59	7/5
KO	175.311	39.9965	13.3322	189	144.56-206.05	9/4
p-value (ANOVA)	WT vs. KO : 0.00192
individual values
	WT	KO
	100.4	220
	176	126
	86	189
	73	141
	93	195
	46.84	114
	113.2	222
		200.8
		170
	n = 5 from 5 mice	n = 9 from 4 mice
mean	98.3486	175.311
S.D.	40.2726	39.9965
S.E.M	15.2216	13.3322

## Sheet: Figure 5D
Tissue									singel cell
		mean	±SD	±SEM	median	95% CI	n			mean	±SD	±SEM	median	95% CI	n
NALCN	WT	1	0	0	1	1	5		WT	0.30156	0.33105	0.05517	0.1906	0.18-0.41	36
	KO	2.24826	1.08363	0.48462	1.62451	0.9-3.5	5		KO	0.52714	0.41163	0.06767	0.4176	0.38-0.66	37
TRPC1	WT	0.74946	0.30195	0.13504	0.91779	0.37-1.12	5		p-value (ANOVA)	WT vs. KO : 0.012
	KO	1.21353	0.72397	0.32377	1.21003	0.31-2.11	5
TRPC2	WT	1.07572	0.34573	0.15461	1.14429	0.64-1.505	5
	KO	1.19559	1.27209	0.5689	0.83694	-0.38-2.77	5
TRPC4	WT	0.79295	0.49249	0.22025	0.89502	0.18-1.4	5
	KO	0.79778	0.42916	0.19193	0.9586	0.26-1.33	5
TRPC5	WT	0.89911	0.24293	0.10864	0.94353	0.59-1.2	5
	KO	1.17706	0.55705	0.24912	1.13674	0.48-1.86	5
TRPC6	WT	0.86865	0.41158	0.18406	0.91384	0.35-1.37	5
	KO	0.73513	0.42748	0.19117	0.89196	0.2-1.26	5
TRPC7	WT	0.94574	0.2569	0.11489	1.09091	0.62-1.26	5
	KO	1.35923	0.50117	0.22413	1.63636	0.73-1.98	5
p-value (ANOVA)	WT vs KO; NALCN : 0.032, TRPC1 : 0.222, TRPC2 : 0.849, TRPC4 : 0.987, TRPC5 : 0.336, TRPC6 : 0.628, TRPC7 : 0.139
individual values
	Tissue															single cell
	NALCN		TRPC1		TRPC2		TRPC4		TRPC5		TRPC6		TRPC7			WT	KO
	WT	KO	WT	KO	WT	KO	WT	KO	WT	KO	WT	KO	WT	KO		0.3368	1.057
	1	1.51571	0.35355	0.17314	1.14429	0.71429	0.30566	0.08839	0.51051	0.37893	0.30355	0.26243	1.19279	1.8018		1	1.181
	1	1.62451	0.49655	1.3287	1.1837	1.0387	0.2973	1.09054	1.181	1.92525	0.91384	0.29321	0.673	0.814		0.9931	0.8827
	1	3.51869	1	1.21003	0.89825	3.366	0.89502	0.71451	0.95926	1.08301	0.73204	1.09812	1.09091	1.63636		1	0.2031
	1	3.3289	0.97943	2.21154	1.54	0.022	1.44393	1.13685	0.90126	1.36136	1.44394	0.89196	0.662	0.814		0.473	0.7474
	1	1.25349	0.91779	1.14423	0.61236	0.83694	1.02286	0.9586	0.94353	1.13674	0.94987	1.12991	1.11	1.73		0.0063	0.2994
	n = 5 mice															0.8888	0.409
																0.2365	0.4176
mean	1	2.24826	0.74946	1.21353	1.07572	1.19559	0.79295	0.79778	0.89911	1.17706	0.86865	0.73513	0.94574	1.35923		0.1528	0.6507
S.D.	2.32147e-06	1.08363	0.30195	0.72397	1.27209	0.49249	0.49249	0.42916	0.24294	0.55706	0.41158	0.42748	0.2569	0.50117		0.0703	0.1037
S.E.M	1.03819e-06	0.48461	0.13504	0.32377	0.5689	0.22025	0.22025	0.19193	0.10864	0.24912	0.18406	0.19117	0.11489	0.22413		0.1387	0.8889
																0.2269	0.0915
																0.0221	0.0242
																0.1191	1.4641
																0.0369	0.6029
																1	0.79
																0.25	0.0643
																0.0836	0.0684
																0.1856	0.3737
																0.0829	1.1329
																0.2327	0.1989
																0.5371	0.9395
																0.2559	0.5497
																0.0037	0.3878
																0.1956	0.2117
																0.197	0.04
																0.0932	0.1472
																0.0012	0.9701
																0.1751	0.0806
																0.0466	0.0823
																0.3368	0.1282
																1	0.1751
																0.0667	1.057
																0.0773	1.181
																0.2304	0.8827
																0.1035	0.5694
																	0.4504
																n = 36 from 4 mice	n = 37 from 5 mice
															mean	0.30156	0.52713
															S.D.	0.331	0.411
															S.E.M	0.05518	0.06767

## Sheet: Figure 5F
	WT	het	TRPC3 KO
	0.99999	1.22019	1.62509
	1	1.10299	1.50425
	1	1.01786	1.25822
mean	1	1.11368	1.46252
S.D.	5.7735e-06	0.10159	0.18696
S.E.M	3.33333e-06	0.05865	0.10794
75 Kda	------
