# Supplementary material for: TRPC3 and NALCN channels drive pacemaking in substantia nigra dopaminergic neurons
Source: eLife. 2021 Aug 19;10:e70920. doi: 10.7554/eLife.70920 (PMC8456572; doi:10.7554/eLife.70920)
Supplement: Figure 6—source data 1. [file elife-70920-fig6-data1.xlsx]

## Sheet: Figure 6
Membrane potential (Fig. 6b)										Hyperpolarizatoin in pyr10&L703,606 (Fig. 6c)
		mean	±SD	±SEM	median	95% CI	n				mean	±SD	±SEM	median	95% CI	n
Pyr10	TTX	-57.884	1.94092	0.86801	-57.47	-60.29~-55.47	5			TTX	-7.81674	1.74706	0.78131	-7.04848	-9.98~-5.64	5
	TTX&ZD-7288	-60.39	2.85015	1.27463	-61.25	-63.92~-56.85	5			TTX&ZD-7288	-15.5853	4.2443	1.73273	-15.8522	-20.03~-11.13	6
L703,606	TTX	-58.2583	3.7486	1.53036	-58.565	-62.19~-54.32	6			p-value (ANOVA)	TTX vs. TTX&ZD-7288 : 0.00418
	TTX&ZD-7288	-58.7133	4.08489	1.66765	-60.39	-63.00~-54.42	6
pyr10&L703,606	TTX	-55.946	4.06367	1.81733	-55.36	-60.99~-50.9	5
	TTX&ZD-7288	-68.6315	3.62853	1.48134	-67.3098	-72.43~-64.82	6
p-value (ANOVA)	Pyr10&L703,606, TTX vs. TTX&ZD-7288 : 3.93924E-4; pyr10&ZD-7288 in TTX&ZD-7288 vs. all other data : p<0.01
Contribution (Fig. 6d)
	mean	±SD	±SEM	median	95% CI	n
Pyr10	33.7565	9.77354	3.99003	33.9649	23.49-44.01	6
L703,606	37.4273	6.53408	2.92213	36.2845	29.31-45.54	5
Pyr10&L703,606	65.2697	4.78566	1.95374	67.1578	60.24-70.29	6
p-value (ANOVA)	Pyr10 vs. pyr10&L703,606 : 3.32196E-5, L703,606 vs pyr10&L703,6060 : 1.87646E-5
individual values
		Fig. 6b								Fig. 6c				Fig. 6d
		Pyr10		L703,606		Pyr10&L703,606				TTX	TTX&ZD-7288			Pyr10	L703,606	Pyr10&L703,606
		TTX	TTX&ZD-7288	TTX	TTX&ZD-7288	TTX	TTX&ZD-7288			-5.94402	-16.0275			42.7095	47.8062	56.1373
		-60.15	-64.02	-62.45	-55.39	-54.57	-65.6996			-9.67516	-18.4295			40.9789	29.7751	68.015
		-59.57	-56.81	-61.7	-52.17	-51.35	-75.1238			-9.68309	-21.6327			43.8016	35.6512	66.3015
		-57.47	-58.3	-59.55	-59.94	-62.48	-67.8969			-7.04848	-10.246			26.2402	36.2845	68.014
		-56.69	-61.57	-55.67	-60.89	-55.97	-65.8836			-6.73295	-11.499			26.9509	37.6196	68.9804
		-55.54	-61.25	-57.58	-63.05	-55.36	-66.7227				-15.677			21.8579		64.1699
				-52.6	-60.84		-70.4621			n = 5 from 3 mice	n = 6 from 3 mice
		n = 5 from 5 mice	n = 5 from 6 mice	n = 6 from 5 mice	n = 6 from 4 mice	n = 5 from 3 mice	n = 6 from 4 mice
mean		-57.884	-60.39	-58.2583	-58.7133	-55.946	-68.6315			-7.81674	-15.5853			33.7565	37.4273	65.2697
S.D.		1.94092	2.85015	3.7486	4.08489	4.06367	3.62853			1.74706	4.2443			9.77354	6.53408	4.78566
S.E.M		0.86801	1.27463	1.53036	1.66765	1.81733	1.48134			0.78131	1.73273			3.99003	2.92213	1.95374
